# Supplementary material for: Cardiac events after allo-HCT in patients with acute myeloid leukemia
Source: PubMed Central journal article supplement — Blood Adv. 2024 Aug 26;8(21):5497–509. doi: 10.1182/bloodadvances.2024013535 (PMC11538614; doi:10.1182/bloodadvances.2024013535), 2024-08-26
Supplement: BLOODA_ADV-2024-013535-mmc1.pdf [file BLOODA_ADV-2024-013535-mmc1.pdf]

**SUPPLEMENTARY MATERIAL**

**Supplementary Table 1. Risk Factors for Early Cardiac Events. Univariate Analysis.**

| <b>Univariate Regression Analysis</b>   | <b>Risk for ECE<br/>HR (95% CI)</b> | <b>P value</b> |
|-----------------------------------------|-------------------------------------|----------------|
| <b>Age</b>                              |                                     |                |
| Continuous variable                     | 1.02 (1.01-1.05)                    | 0.033          |
| Older than 59 years (vs. younger)       | 2.04 (1.16-3.57)                    | 0.012          |
| <b>Sex</b>                              |                                     |                |
| Female (vs. Male)                       | 0.76 (0.43-1.34)                    | 0.35           |
| <b>Active smoker at Allo-HCT</b>        |                                     |                |
| Yes (vs. no)                            | 1.14 (0.48-2.68)                    | 0.76           |
| <b>Hypertension</b>                     |                                     |                |
| Yes (vs. no)                            | 2.71 (1.53-4.82)                    | <0.001         |
| <b>Dyslipidemia</b>                     |                                     |                |
| Yes (vs. no)                            | 3.06 (1.66-5.62)                    | <0.001         |
| <b>Diabetes Mellitus</b>                |                                     |                |
| Yes (vs. no)                            | 1.14 (0.40-3.18)                    | 0.8            |
| <b>Obesity</b>                          |                                     |                |
| Yes (vs. no)                            | 0.27 (0.03-1.96)                    | 0.2            |
| <b>Previous cardiac pathology</b>       |                                     |                |
| Yes (vs. no)                            | 1.75 (0.88-3.53)                    | 0.11           |
| <b>HCT-CI</b>                           |                                     |                |
| >3 (vs. 0-3)                            | 1.51 (0.75-3.01)                    | 0.24           |
| <b>Disease Status Prior to Allo-HCT</b> |                                     |                |
| Active disease (vs. Complete Remission) | 1.60 (0.72-3.57)                    | 0.24           |
| <b>Conditioning Regimen</b>             |                                     |                |
| MAC (vs. RIC)                           | 1.16 (0.59-2.27)                    | 0.677          |
| <b>Conditioning Regimen</b>             |                                     |                |
| MAC regimen including Cy (vs. other)    | 0.55 (0.19-1.53)                    | 0.26           |
| <b>High Dose TBI</b>                    |                                     |                |
| Yes (vs. no)                            | 0.44 (0.06-3.22)                    | 0.42           |
| <b>Donor</b>                            |                                     |                |
| Haploidentical (vs. others)             | 2.44 (1.39-4.28)                    | 0.001          |
| <b>GVHD prophylaxis</b>                 |                                     |                |
| PTCY-based (vs. others)                 | 3.10 (1.67-5.76)                    | <0.001         |
| <b>Graft Failure</b>                    |                                     |                |
| Time-dependent variable                 | 0.86 (0.11-6.51)                    | 0.887          |
| <b>Grade 2-4 aGVHD</b>                  |                                     |                |
| Time-dependent variable                 | 1.45 (0.62-3.42)                    | 0.385          |
| <b>Grade 3-4 aGVHD</b>                  |                                     |                |
| Time-dependent variable                 | 2.19 (0.74-6.47)                    | 0.155          |

CE variable has been treated as time dependent variable. CE occurring after disease relapse have not been accounted

**Supplementary Table 2. Risk Factors for Late Cardiac Events. Univariate Analysis.**

| <b>Univariate Regression Analysis</b>    | <b>Risk for ECE<br/>HR (95% CI)</b> | <b>P value</b> |
|------------------------------------------|-------------------------------------|----------------|
| <b>Age</b>                               |                                     |                |
| Continuous variable                      | 1.03 (1.01-1.06)                    | 0.002          |
| Older than 50 years (vs. younger)        | 3.06 (1.43- 6.53)                   | 0.003          |
| <b>Sex</b>                               |                                     |                |
| Female (vs. Male)                        | 0.68 (.37-1.24)                     | 0.22           |
| <b>Active smoker at Allo-HCT</b>         |                                     |                |
| Yes (vs. no)                             | 1.59 (0.71-3.55)                    | 0.25           |
| <b>Hypertension</b>                      |                                     |                |
| Yes (vs. no)                             | 2.43 (1.30- 4.54)                   | 0.005          |
| <b>Dyslipidemia</b>                      |                                     |                |
| Yes (vs. no)                             | 3.28 (1.72-6.28)                    | <0.001         |
| <b>Diabetes Mellitus</b>                 |                                     |                |
| Yes (vs. no)                             | 2.22 (0.94-5.26)                    | 0.06           |
| <b>Obesity</b>                           |                                     |                |
| Yes (vs. no)                             | 3.09 (2.01-8.30)                    | <0.001         |
| <b>Previous cardiac pathology</b>        |                                     |                |
| Yes (vs. no)                             | 3.14 (1.64-6.01)                    | <0.001         |
| <b>HCT-CI</b>                            |                                     |                |
| >3 (vs. 0-3)                             | 0.63 (0.22-1.75)                    | 0.38           |
| <b>Disease Status Prior to Allo-HCT</b>  |                                     |                |
| Active disease (vs. Complete Remission)  | 0.24 (0.03-1.73)                    | 0.16           |
| <b>Conditioning Regimen</b>              |                                     |                |
| MAC (vs. RIC)                            | 1.01 (0.52-1.93)                    | 0.970          |
| <b>Conditioning Regimen</b>              |                                     |                |
| MAC regimen including Cy (vs. other)     | 0.38 (0.12-1.21)                    | 0.1            |
| <b>High Dose TBI</b>                     |                                     |                |
| Yes (vs. no)                             | 0.40 (0.05-2.80)                    | 0.36           |
| <b>Donor</b>                             |                                     |                |
| Haploidentical (vs. others)              | 1.70 (0.92-3.12)                    | 0.086          |
| <b>GVHD prophylaxis</b>                  |                                     |                |
| PTCY-based (vs. others)                  | 1.28 (0.71-2.31)                    | 0.41           |
| <b>Grade 2-4 aGVHD (before day +100)</b> |                                     |                |
| Yes (vs. No)                             | 2.29 (1.26-4.16)                    | 0.006          |
| <b>Moderate/Severe cGVHD</b>             |                                     |                |
| Time-dependent variable                  | 1.21 (0.37-3.91)                    | 0.742          |

CE variable has been treated as time dependent variable. CE occurring after disease relapse have not been accounted

**Supplementary Table 3. Risk Factors for OS and NRM. Univariate Analysis**

| <b>Univariate Regression Analysis</b>    | <b>OS<br/>HR (95% CI)</b> | <b>P value</b> | <b>NRM<br/>HR (95% CI)</b> | <b>P value</b> |
|------------------------------------------|---------------------------|----------------|----------------------------|----------------|
| <b>Patient Age</b>                       |                           |                |                            |                |
| Age median (continuous)                  | 1.01(1.01-1.03)           | 0.002          | 1.03 (1.01-1.05)           | <0.001         |
| Older 59 years (vs. younger)             | 1.62 (1.19-2.21)          | 0.002          | 1.95 (1.26-3.01)           | 0.002          |
| <b>Sex</b>                               |                           |                |                            |                |
| Female (vs. male)                        | 0.79 (0.58-1.08)          | 0.144          | 0.91 (0.59-1.41)           | 0.7            |
| <b>Relevant comorbidities</b>            |                           |                |                            |                |
| HTN (vs. No)                             | 1.68 (1.18-2.37)          | 0.003          | 2.1 (1.32-3.33)            | 0.001          |
| Dyslipidemia (vs. No)                    | 1.98 (1.34-2.94)          | <0.001         | 2.13 (1.26-3.58)           | 0.004          |
| Diabetes Mellitus (vs. No)               | 1.98 (1.23-3.21)          | 0.005          | 2.66 (1.45-4.87)           | <0.001         |
| Obesity (vs. No)                         | 1.78 (1.07-2.94)          | 0.024          | 2.77 (1.52-5.05)           | <0.001         |
| History of Cardiac Disease (vs. No)      | 1.24 (0.80-1.94)          | 0.323          | 1.50 (0.85-2.65)           | 0.16           |
| <b>Disease status prior allo-HCT</b>     |                           |                |                            |                |
| Refractory AML / Active Disease (vs. CR) | 3.03 (2.02-4.45)          | <0.001         | 1.17 (0.57-2.39)           | 0.65           |
| <b>HCT-CI</b>                            |                           |                |                            |                |
| >3 (vs. 0-3)                             | 1.57 (1.07-2.31)          | 0.018          | 2.07 (1.25-3.42)           | 0.004          |
| <b>Intensity</b>                         |                           |                |                            |                |
| RIC (vs. MAC)                            | 1.62 (1.19-2.21)          | 0.002          | 1.98 (1.27-3.09)           | 0.002          |
| <b>Donor type</b>                        |                           |                |                            |                |
| Haploidentical (vs. Others)              | 1.35 (0.98-1.87)          | 0.069          | 1.80 (1.12-2.89)           | 0.015          |
| <b>Donor</b>                             |                           |                |                            |                |
| 10/10 MUD (vs. MSD)                      | 0.78 (0.44-1.38)          | 0.402          | 1.57 (0.67-3.69)           | 0.30           |
| 9/10 MMUD (vs. MSD)                      | 0.83 (0.38-1.83)          | 0.659          | 0.99 (0.27-3.59)           | 0.99           |
| Haploidentical (vs. MSD)                 | 1.21 (0.80-1.81)          | 0.357          | 2.20 (1.09-4.41)           | 0.026          |
| <b>Cumulative Incidence of GVHD</b>      |                           |                |                            |                |
| Grade II-IV aGVHD                        | 1.60 (1.16-2.22)          | <0.001         | 2.12 (1.35-3.33)           | <0.001         |
| Grade II-IV aGVHD                        | 2.32 (1.47-3.65)          | 0.004          | 6.42 (3.94-10.47)          | <0.001         |

**Supplementary Table 4. Baseline Characteristics Based on GVHD Prophylaxis**

| <b>Baseline Characteristics</b>                           | <b>PTCY<br/>N=456</b> | <b>No PTCY<br/>N=558</b> | <b>P value</b> |
|-----------------------------------------------------------|-----------------------|--------------------------|----------------|
| <b>Age median (IQR)</b>                                   | 55 (42-62)            | 54 (45-62)               | 0.982          |
| Older 59 years                                            | 175 (37.4)            | 195 (34.9)               | 0.344          |
| <b>Sex</b>                                                |                       |                          |                |
| Male                                                      | 236 (51.2)            | 488 (87.3)               | 0.368          |
| Female                                                    | 225 (48.8)            | 71 (12.7)                |                |
| <b>Relevant comorbidities</b>                             |                       |                          |                |
| Active smoker                                             | 56(12.1)              | 55 (9.8)                 | 0.996          |
| HTN                                                       | 95 (20.6)             | 101 (18.1)               | 0.331          |
| Dyslipidemia                                              | 60 (13.0)             | 73 (13.1)                | 0.970          |
| Diabetes Mellitus                                         | 36 (7.8)              | 38 (6.8)                 | 0.327          |
| Obesity (BMI≥30)                                          | 34 (7.8)              | 36 (6.4)                 | 0.564          |
| History of Cardiac Disease                                | 60 (13.0)             | 71 (12.7)                | 0.881          |
| <b>Prior treatment with cardiotoxic chemotherapy</b>      | 14 (3)                | 17 (3.0)                 | 0.239          |
| <b>Disease status prior allo-HCT</b>                      |                       |                          |                |
| Complete Remission                                        | 414 (89.8)            | 509 (91.1)               | 0.498          |
| Refractory AML / Active Disease                           | 47 (10.2)             | 50 (8.9)                 |                |
| <b>HCT-CI</b>                                             |                       |                          |                |
| >3                                                        | 73 (15.8)             | 69 (13.2)                | 0.174          |
| Missing                                                   | 23                    | 41                       |                |
| <b>Allo-HCT Information</b>                               |                       |                          |                |
| <b>Intensity</b>                                          |                       |                          |                |
| Myeloablative                                             | 249 (54.0)            | 345 (61.7)               | 0.013          |
| Reduced intensity                                         | 212 (46.0)            | 214 (38.3)               |                |
| <b>MAC Regimen containing Cy</b>                          | 41 (8.9)              | 99 (17.7)                | 0.001          |
| <b>Total Body Irradiation (TBI) (High dose TBI: 12Gy)</b> | 4 (0.9)               | 41 (7.3)                 | 0.001          |
| <b>Donor</b>                                              |                       |                          |                |
| 10/10 MSD                                                 | 86 (18.7)             | 276 (49.4)               | 0.001          |
| 10/10 MUD                                                 | 77 (16.7)             | 222 (39.7)               |                |
| 9/10 MMUD                                                 | 30 (6.5)              | 56 (10.0)                |                |
| Haploidentical                                            | 268 (58.1)            | 5 (0.9)                  |                |
| <b>Median Follow-up, months (IQR)</b>                     | 26.6 (10.0-51.2)      | 29.6 (9.3-72.7)          | 0.131          |
